# Supplementary material for: Structural mapping of antibody landscapes to human betacoronavirus spike proteins
Source: PubMed Central journal article supplement (PMC9067923; doi:10.1126/sciadv.abn2911), 2022-05-04
Supplement: sciadv.abn2911_sm.pdf [file sciadv.abn2911_sm.pdf]

Supplementary Materials for  
**Structural mapping of antibody landscapes to human betacoronavirus  
spike proteins**

Sandhya Bangaru, Aleksandar Antanasijevic, Nurgun Kose, Leigh M. Sewall,  
Abigail M. Jackson, Naveenchandra Suryadevara, Xiaoyan Zhan, Jonathan L. Torres,  
Jeffrey Copps, Alba Torrents de la Peña, James E. Crowe Jr., Andrew B. Ward\*

\*Corresponding author. Email: [andrew@scripps.edu](mailto:andrew@scripps.edu)

Published 4 May 2022, *Sci. Adv.* **8**, eabn2911 (2022)

DOI: [10.1126/sciadv.abn2911](https://doi.org/10.1126/sciadv.abn2911)

**This PDF file includes:**

Figs. S1 to S10

Tables S1 to S4

## Figures

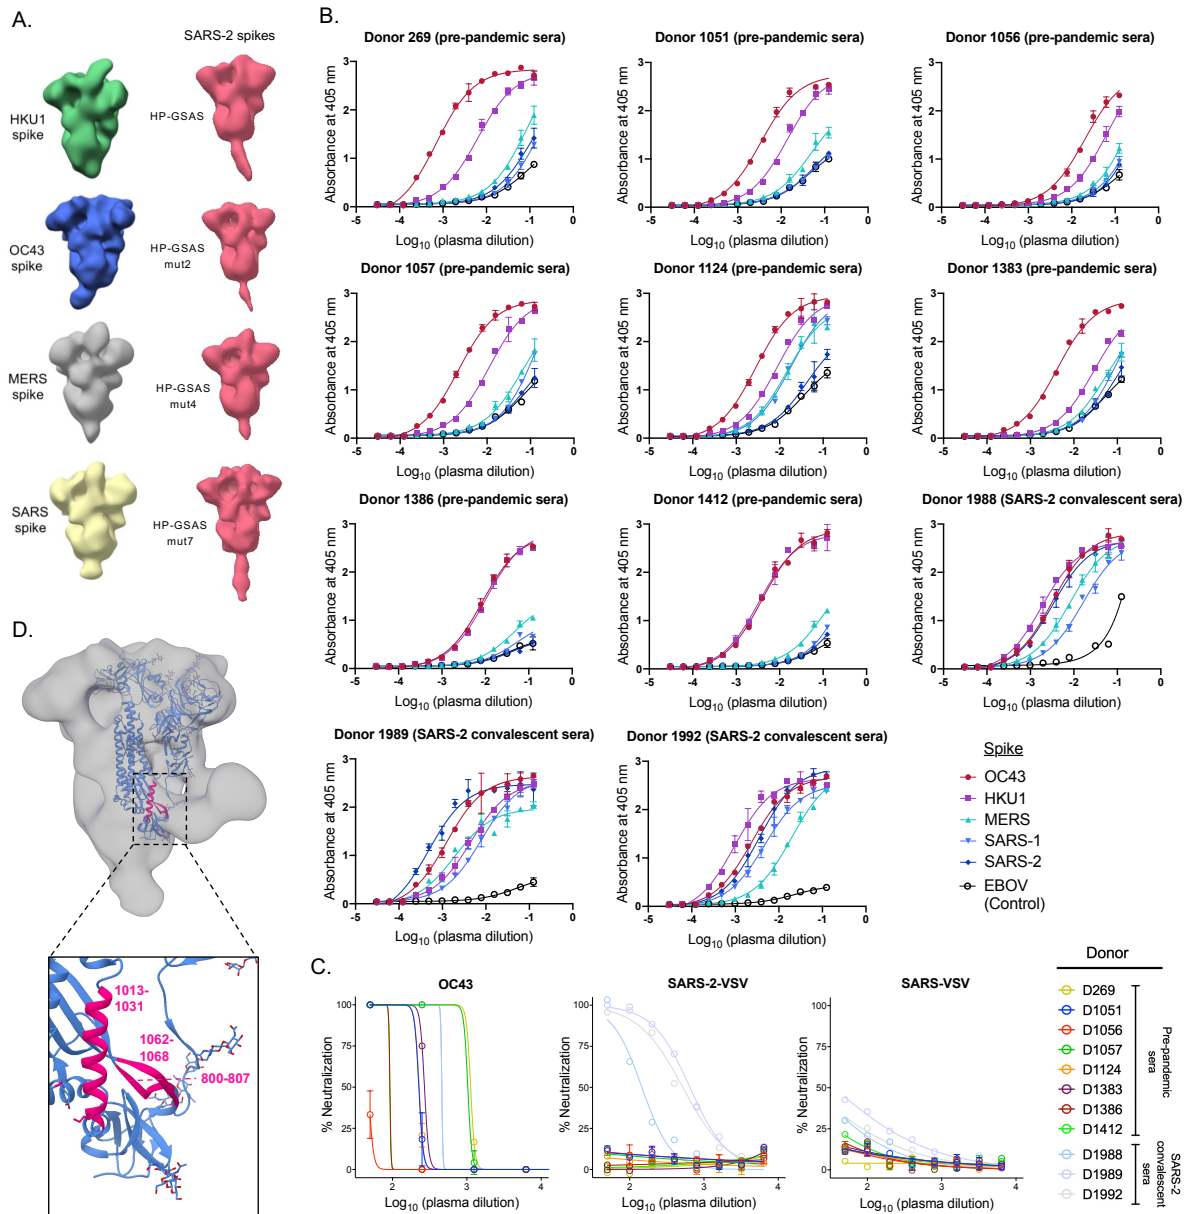

**Figure S1. Serum/plasma antibody responses to  $\beta$ -CoV spikes (A)** ns-EM reconstructions of pre-fusion stabilized spike ectodomains from OC43 (green), HKU1 (blue), MERS (grey), SARS (yellow) and SARS-2 (pink). For SARS-2, a total of four constructs are shown: a base construct (HP-GSAS) with 6 stabilizing proline substitutions and furin cleavage site modification and 3

other constructs with additional disulphide linkages, HP-GSAS Mut2 (S383C and D985C), HP-GSAS Mut4 (A570C and L966C) and HP-GSAS Mut7 (V705C and T883C). **(B)** Binding curves for 11 donor plasma/serum samples against  $\beta$ -CoV spikes as determined by ELISA. Ebolavirus glycoprotein (EBOV GP) was used as a control to determine baseline non-specific serum binding. The binding assay was conducted twice independently (n=2) **(C)** Serum or plasma neutralization curves for 11 donors against OC43 virus or VSV pseudotyped SARS or SARS-2 viruses. **(D)** Ns-EM 3D reconstruction (grey) of OC43 spike in complex with a S2 antibody from donor 1051. One spike protomer (blue) in the model (PDB: 6OHW) is shown docked into the EM density and a zoom-in of the antibody footprint in pink is shown in the bottom panel (29).

**Cryo-EM analysis of HCoV-OC43 spike + polyclonal Fab from donor 269**

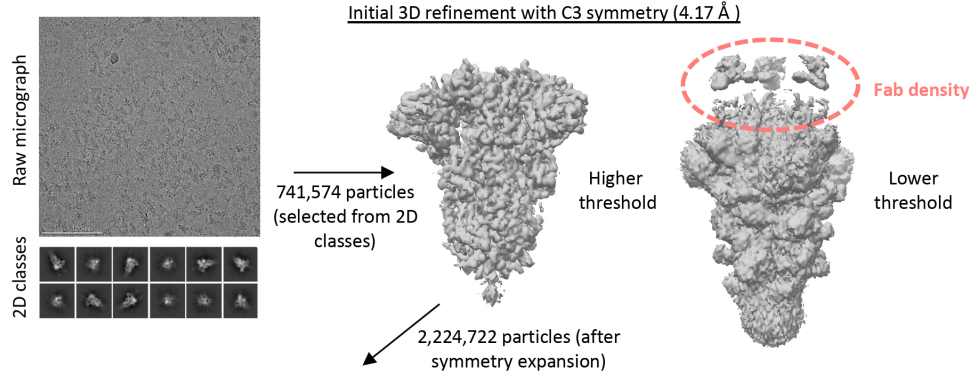

1<sup>st</sup> round of 3D classification with spherical mask to identify fabs

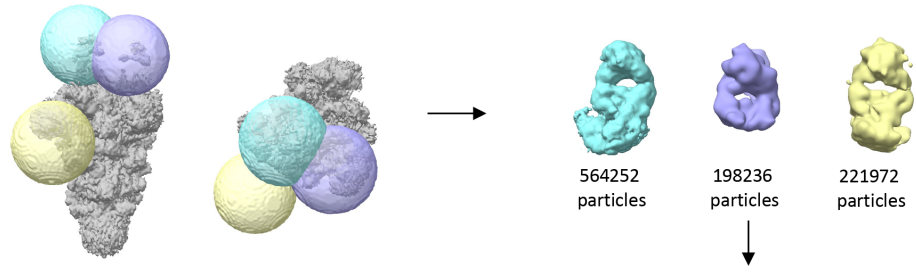

Last round of 3D classification with a full mask to obtain classes with the highest quality and resolution for the entire map

Iterative rounds of 3D classification with spherical mask to enrich for Fab density

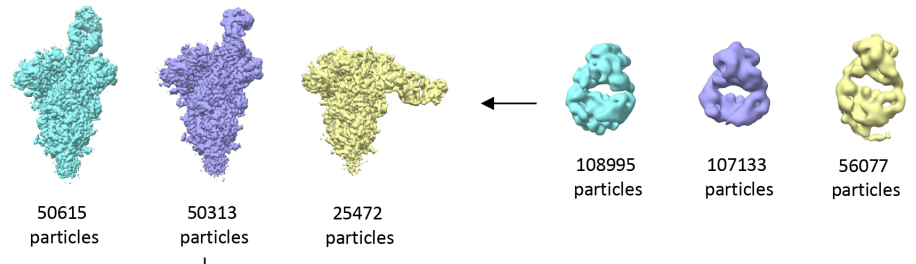

Final refinement and postprocessing

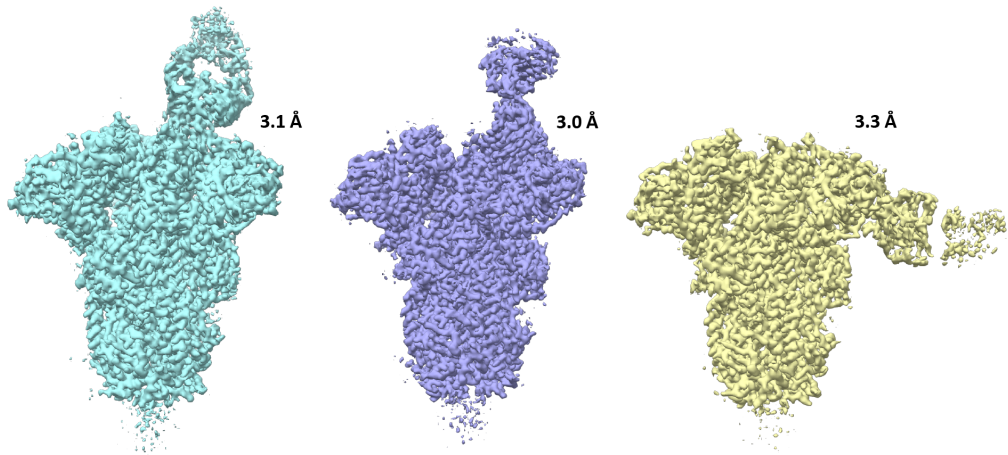

**Figure S2. Schematic representation of the cryo-EMPEM processing workflow for OC43 spike complexed with polyclonal Fabs from donor 269.** The focused classification approach used for generating Fab-spike reconstructions is shown in steps.

# Cryo-EM analysis of HCoV-OC43 spike + polyclonal Fab from donor 1051

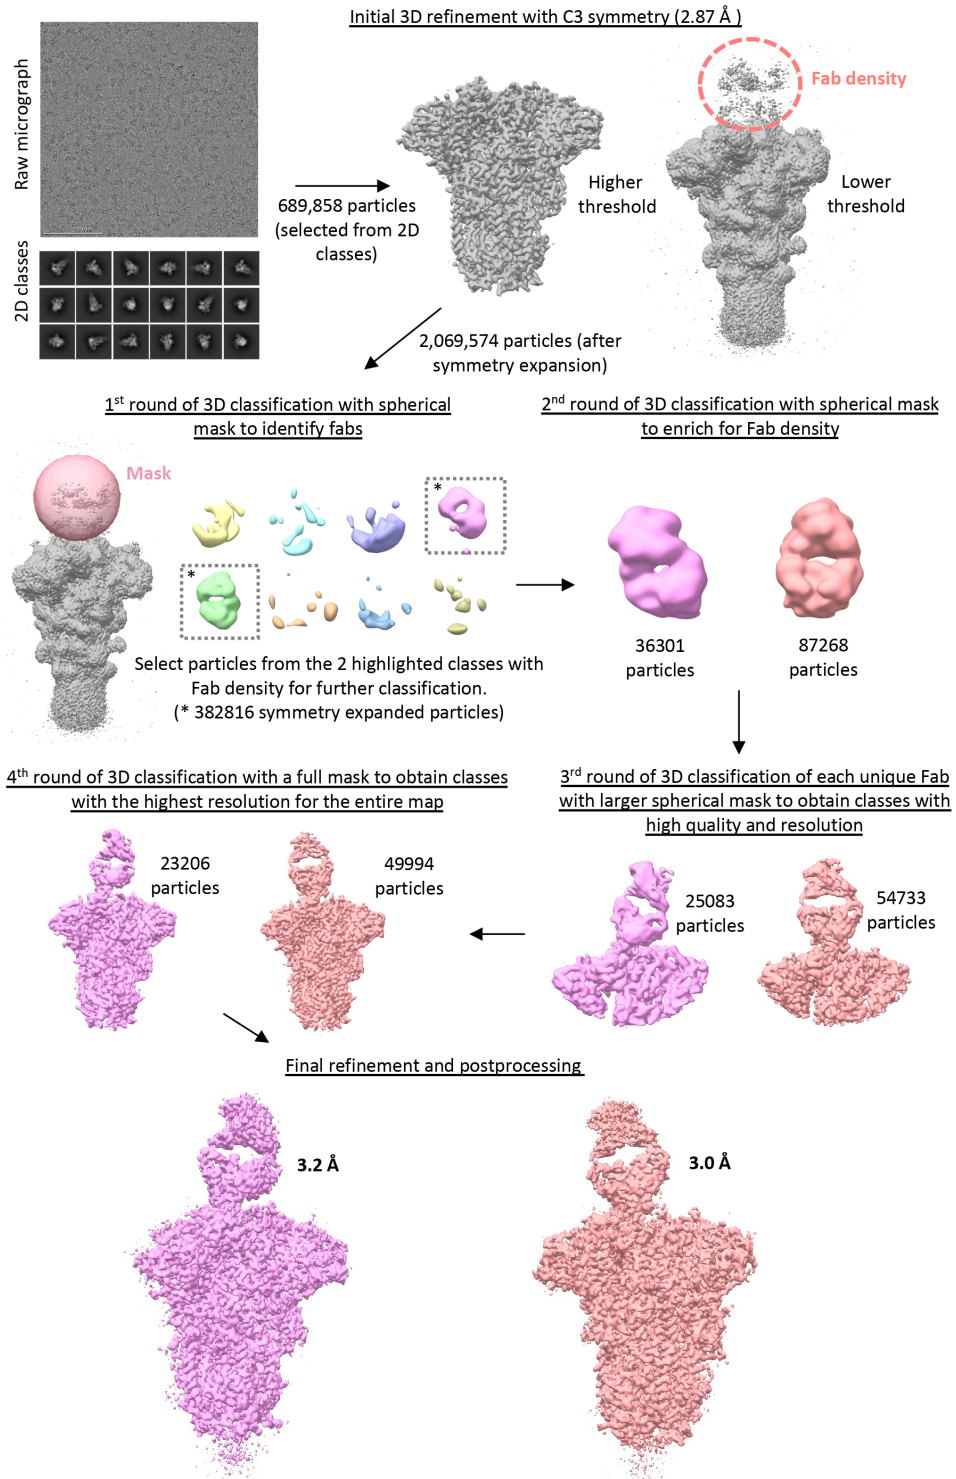

**Figure S3. Schematic representation of the cryo-EMPEM processing workflow for OC43 spike complexed with polyclonal Fabs from donor 1051.** The focused classification approach used for generating Fab-spike reconstructions is shown in steps.

**Cryo-EM analysis of HCoV-OC43 spike + polyclonal Fab from donor 1412**

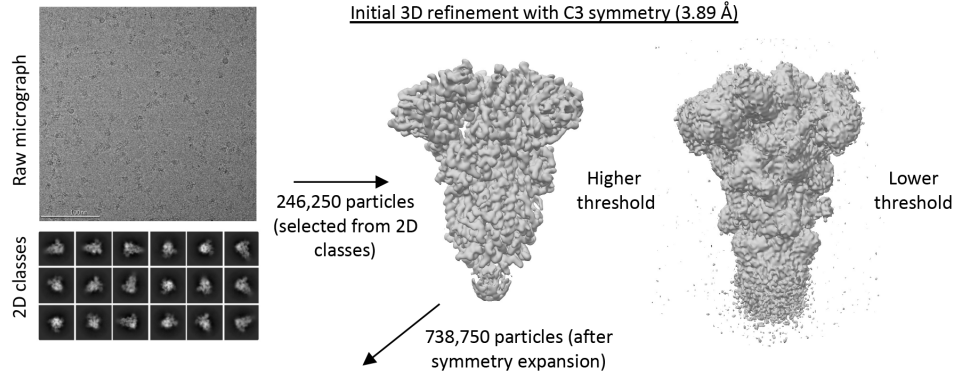

**1<sup>st</sup> round of 3D classification with spherical mask to identify fabs**

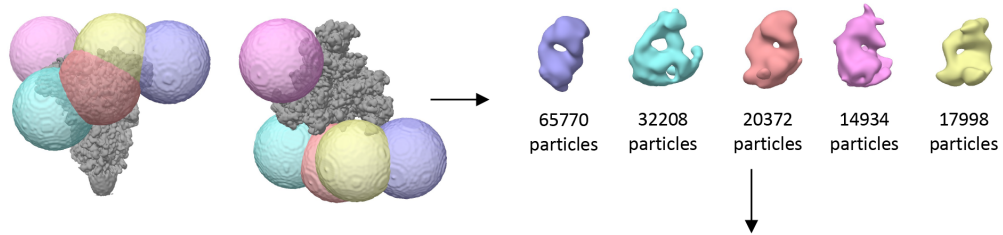

**3<sup>rd</sup> round of 3D classification with a full mask to obtain classes with the highest quality and resolution for the entire map**

**2<sup>nd</sup> round of 3D classification with spherical mask to enrich for Fab density**

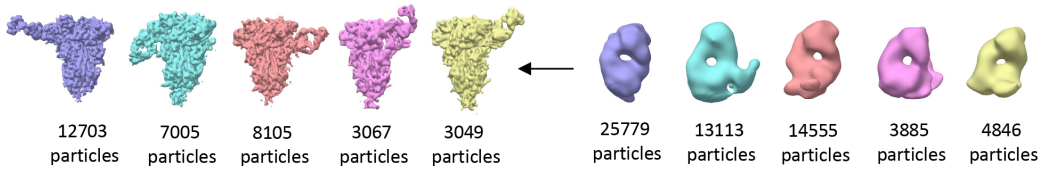

**Final refinement and postprocessing**

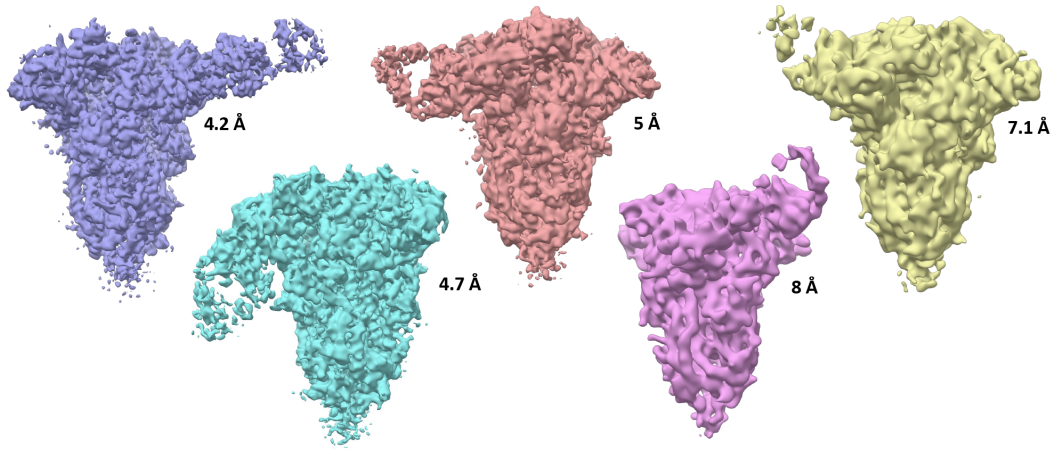



**Figure S4. Schematic representation of the cryo-EMPEM processing workflow for OC43 spike complexed with polyclonal Fabs from donor 1412.** The focused classification approach used for generating Fab-spike reconstructions is shown in steps.

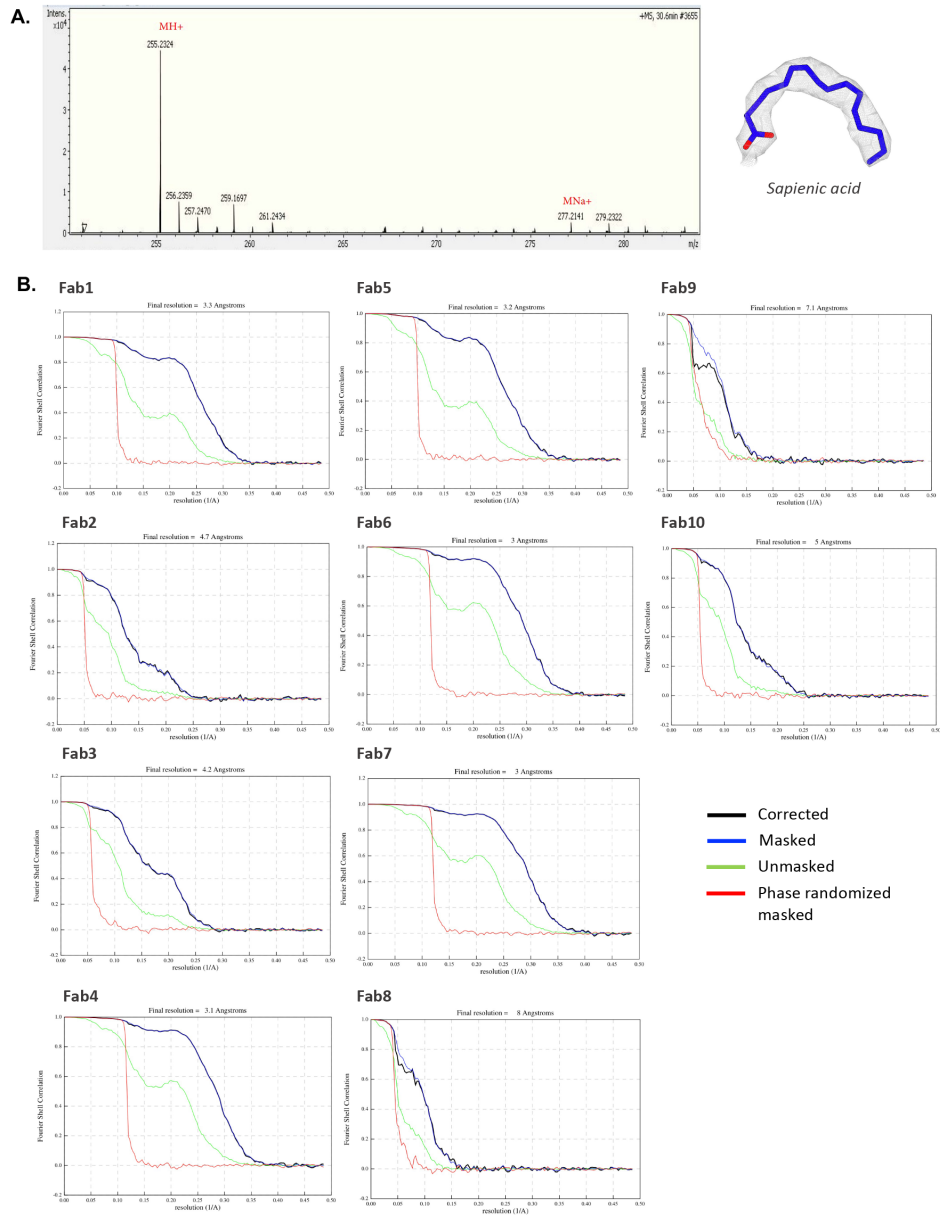

**Figure S5. Cryo-EMPEM structure analysis and validation (A)** Left panel shows mass spectrometry results for HCoV-OC43 spike showing a species with MW of 255 g/mol which corresponds to the protonated form of sapienic acid (MW = 254 g/mol). The right panel shows sapienic acid colored in blue surrounded by its corresponding cryo-EM map density shown as a grey mesh. Sapienic acid has a kink at position 6, originating from a cis double bond, that perfectly

recapitulates the density in our HCoV-OC43 cryo-EM maps. **(B)** FSC curves for HCoV-OC43 spike-Fab cryo-EMPEM reconstructions with C1 symmetry imposed.

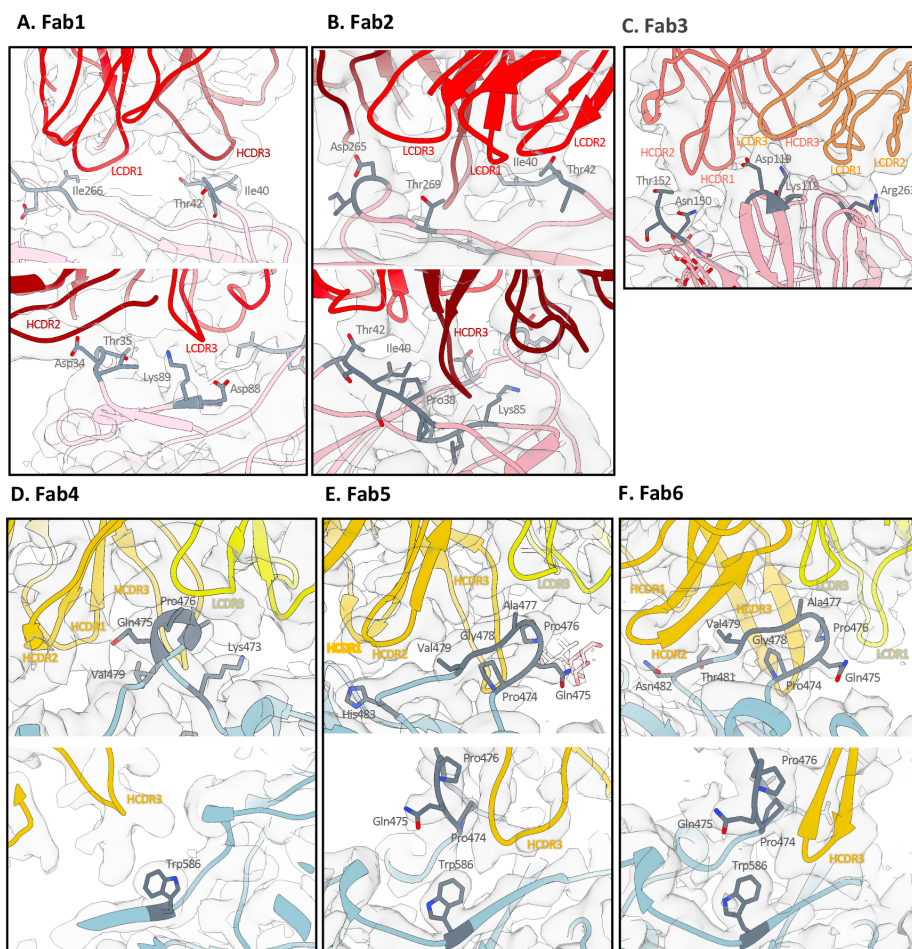

**Figure S6. Epitope-paratope interactions for polyclonal Fabs 1-6 targeting the OC43 spike NTD or CTD.** Ribbon representation of atomic models of OC43 spike-Fab complexes docked into their respective cryo-EM maps with close-up views of epitope-paratope interactions for (A) Fab1, (B) Fab2, (C) Fab3, (D) Fab4, (E) Fab5 and (F) Fab6. The heavy or light chains are colored dark red or light red for NTD-site 1 Fabs (Panels A and B), colored coral or orange for the NTD-site 2 Fab (Panel C), colored mustard or yellow for CTD Fabs (Panel D, E and F) and the spike is colored pink (Panels A, B and C) or blue (Panels D, E and F). The interacting residues are colored grey.

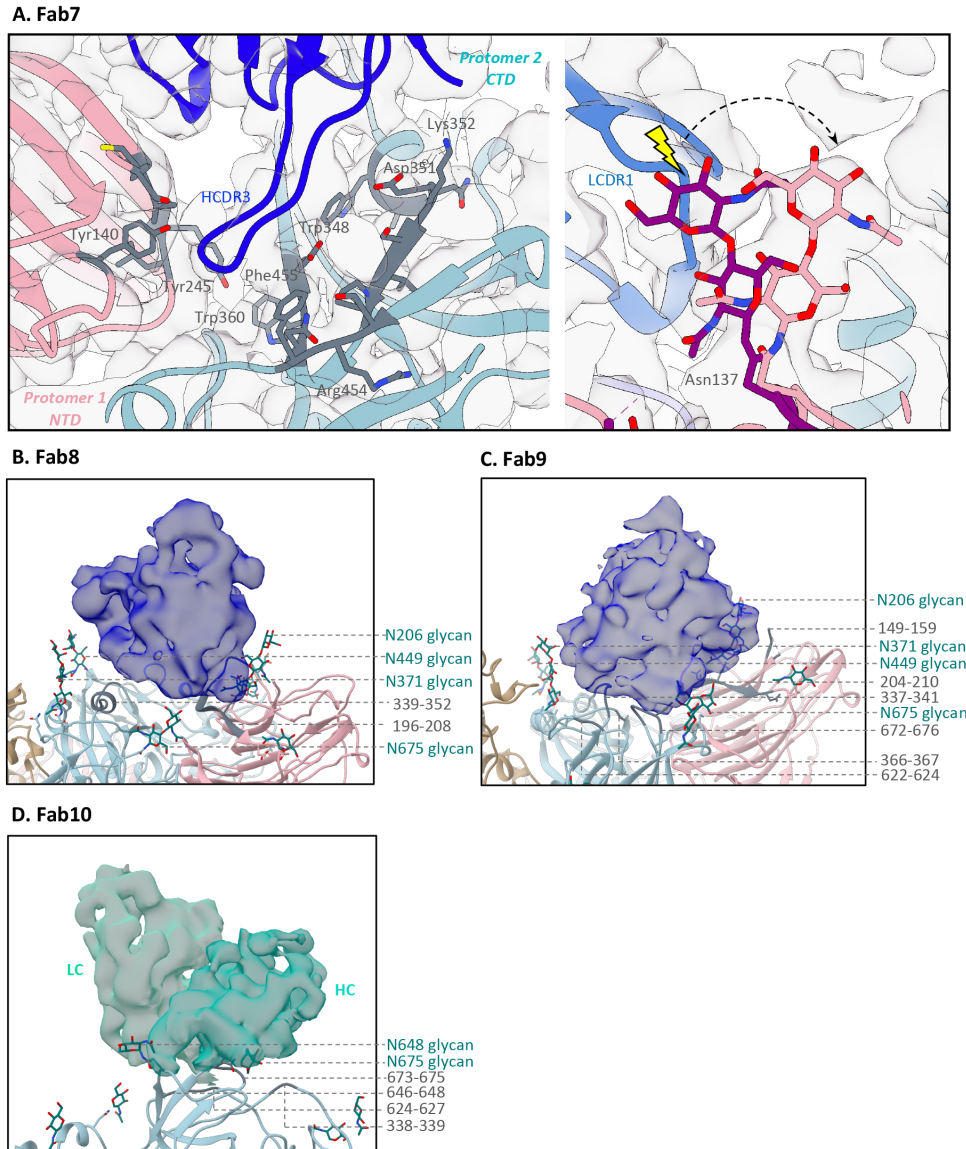

**Figure S7. Epitope-paratope interactions for polyclonal Fabs 7-10 targeting the OC43 spike inter-protomeric interfaces or SD1. (A)** Ribbon representation of atomic model for OC43 spike-Fab7 complex docked into the cryo-EM map with close-up views of epitope-paratope interactions. The Fab heavy and light chains are colored dark blue and light blue, respectively. The adjacent spike protomers are colored pink and blue with the interacting residues colored grey. The right panel shows displacement of N137 glycan (light pink) by LCDR3 compared to the published

structure shown in magenta (PDB 6OHW)(29). **(B and C)** Close-up views of epitope-paratope interactions for OC43 spike- **(B)** Fab8 and **(C)** Fab9 complexes displaying the cryo-EM density corresponding to the Fab in blue with ribbon representation of spike protomers in blue, pink or tan and interacting residues in grey. **(D)** Close-up view of epitope-paratope interaction for OC43 spike-Fab10 complex displaying the cryo-EM density corresponding to Fab heavy chain and light chain in shades of cyan and ribbon representation of a spike protomer in blue with interacting residues in grey. Glycans are colored teal in panels B, C and D.

**Cryo-EM analysis of SARS-2 spikes + pooled polyclonal Fabs from donor 1988 and 1989**

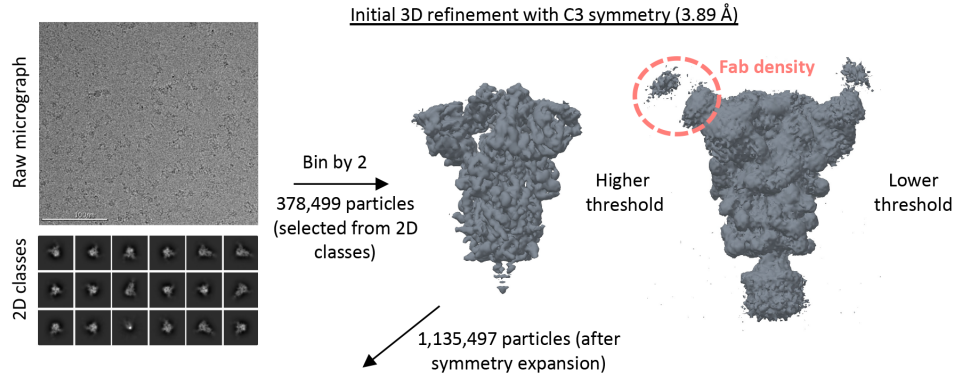

1<sup>st</sup> round of 3D classification with spherical mask to identify fabs

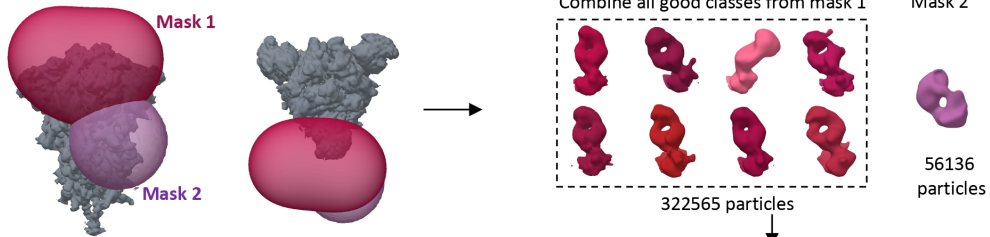

3<sup>rd</sup> round of 3D classification with either an intermediate mask comprising of NTD and Fv domain of the Fab or a full mask

2<sup>nd</sup> round of 3D classification with spherical mask to enrich for Fab density

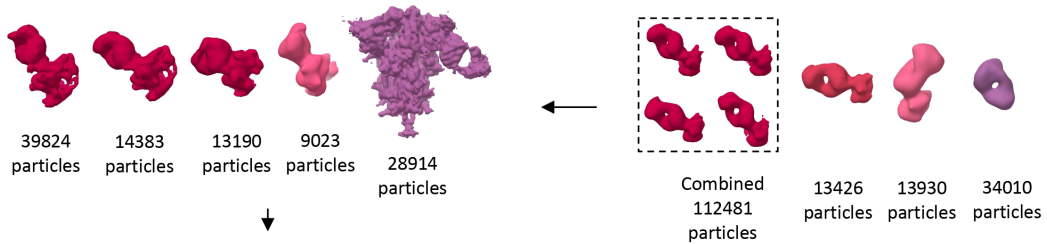

Final refinement and postprocessing

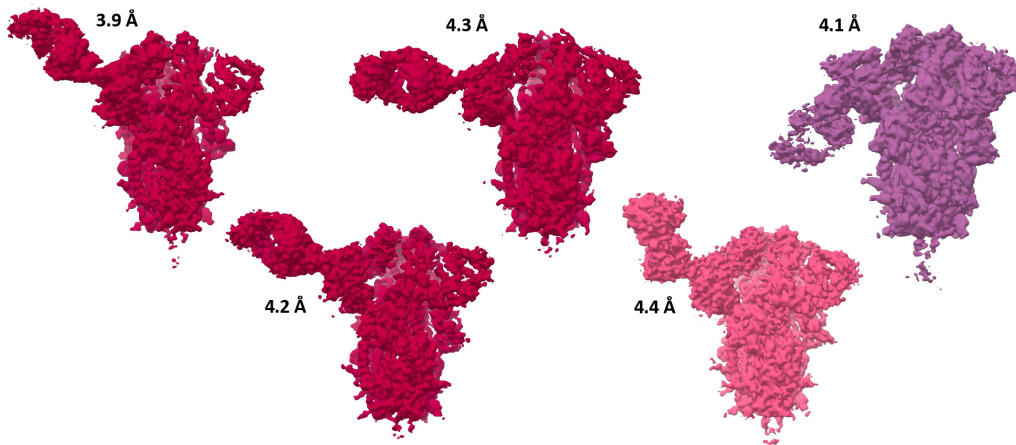

**Figure S8. Schematic representation of the cryo-EMPEM processing workflow for SARS-2 spikes complexed with polyclonal Fabs from donors 1988 and 1989.** The focused classification approach used for generating Fab-spike reconstructions is shown in steps.



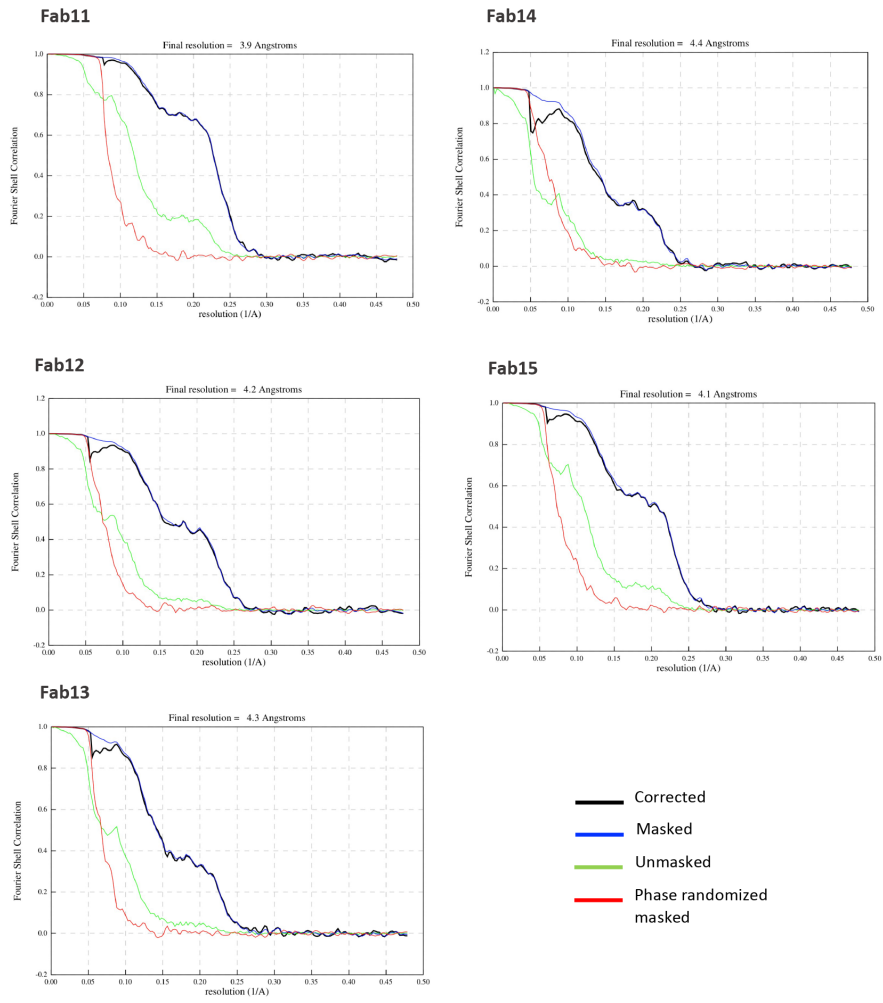

**Figure S9. FSC curves for SARS-2 spike-Fab cryo-EMPEM reconstructions with C1 symmetry imposed.**

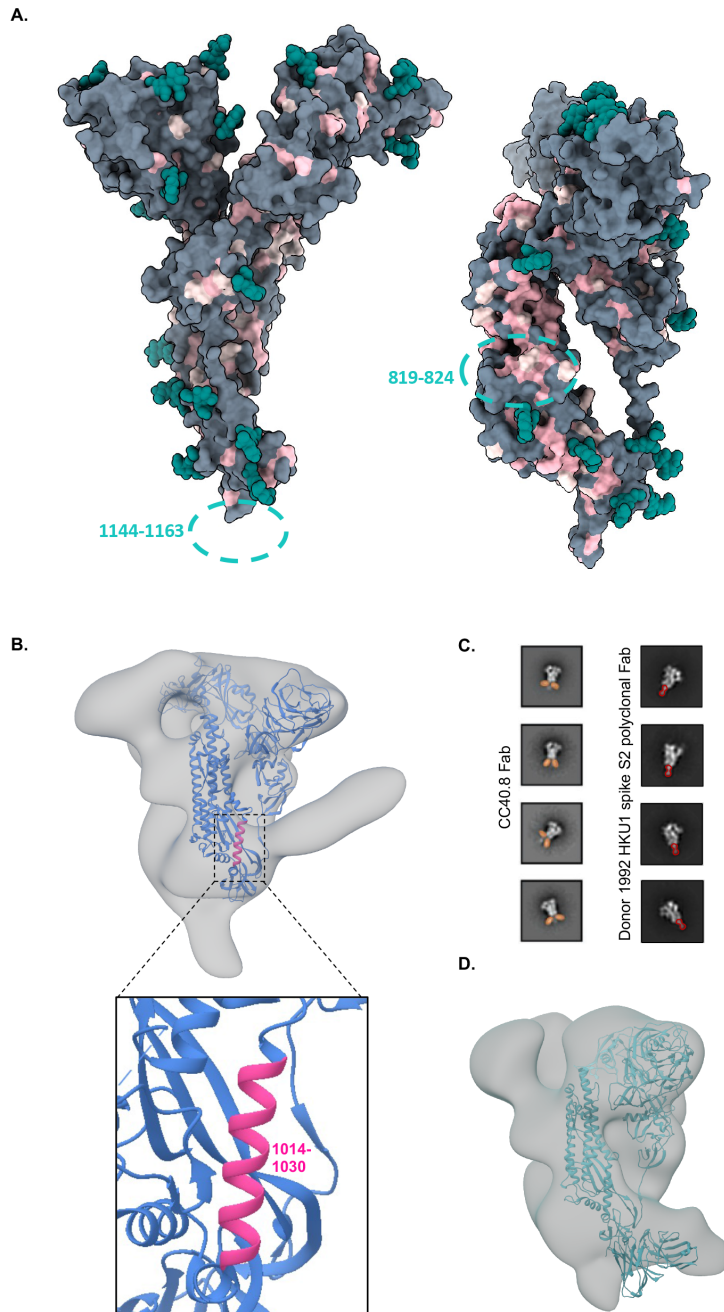

**Figure S10.  $\beta$ -CoV cross-reactive responses in SARS-2 convalescent donors.** (A) Surface representation of SARS-2 spike monomer (PDB 7JJI) colored grey and glycans colored teal. Residues on SARS-2 spike that are either identical to or have a conserved substitution in at least 3 of the 4 other  $\beta$ -CoVs, OC43, HKU1, SARS and MERS are colored in pink and light pink,

respectively. Conserved residues of interest from published studies (18, 20) are depicted on the model for reference. **(B)** ns-EM 3D reconstruction (grey) of OC43 spike in complex with a S2 antibody from donor 1989. One spike protomer (blue) in the model (PDB: 6OHW)(29) is shown docked into the EM density and a zoom-in of the antibody footprint in pink is shown in the bottom panel. **(C)** ns-EM 2D class averages for HKU1 spike complexed with either Fab CC40.8 (8) or a S2 antibody from donor 1992; the Fabs are false-colored orange and red, respectively. **(D)** Ns-EM 3D reconstruction (grey) of MERS spike in complex with a S2 antibody from donor 1989. One MERS spike protomer bound to G4 Fab colored in green (PDB: 5W9M) (27) is shown docked into the EM density for comparison.

**Table S1. Cryo-EM data collection**

| <b>Data collection</b>                         | <b>HCoV-OC43-269</b> | <b>HCoV-OC43-1051</b> | <b>HCoV-OC43-1412</b> | <b>SARS-CoV-2-1988/1989</b> |
|------------------------------------------------|----------------------|-----------------------|-----------------------|-----------------------------|
| Microscope                                     | FEI Titan Krios      | FEI Titan Krios       | FEI Titan Krios       | FEI Titan Krios             |
| Voltage (kV)                                   | 300                  | 300                   | 300                   | 300                         |
| Detector                                       | Gatan K2 Summit      | Gatan K2 Summit       | Gatan K2 Summit       | Gatan K2 Summit             |
| Recording mode                                 | Counting             | Counting              | Counting              | Counting                    |
| Nominal magnification                          | 29,000               | 29,000                | 29,000                | 29,000                      |
| Movie micrograph pixel size (Å)                | 1.03                 | 1.03                  | 1.03                  | 1.045                       |
| Dose rate (e <sup>-</sup> /[(camera pixel)*s]) | 5.6                  | 5.7                   | 5.3                   | 7.2                         |
| Number of frames per movie micrograph          | 38                   | 37                    | 40                    | 30                          |
| Frame exposure time (ms)                       | 250                  | 250                   | 250                   | 250                         |
| Movie micrograph exposure time (s)             | 9.5                  | 9.25                  | 10                    | 7.5                         |
| Total dose (e <sup>-</sup> /Å <sup>2</sup> )   | 50                   | 50                    | 50                    | 50                          |
| Defocus range (µm)                             | -0.8 to -1.5         | -0.8 to -1.8          | -0.3 to -1.3          | -0.7 to -1.7                |
| Number of movie micrographs                    | 4370                 | 2575                  | 2321                  | 5405                        |

**Table S2. Refinement and model building statistics for HCoV-OC43-Fab complexes**

| Map                                          | HCoV-OC43-Fab1 | HCoV-OC43-Fab2 | HCoV-OC43-Fab3 | HCoV-OC43-Fab4 | HCoV-OC43-Fab5 | HCoV-OC43-Fab6 | HCoV-OC43-Fab7 | HCoV-OC43-Fab8 | HCoV-OC43-Fab9 | HCoV-OC43-Fab10 |
|----------------------------------------------|----------------|----------------|----------------|----------------|----------------|----------------|----------------|----------------|----------------|-----------------|
| EMDB                                         | EMD-24968      | EMD-24969      | EMD-24970      | EMD-24989      | EMD-24990      | EMD-24991      | EMD-24992      | EMD-24993      | EMD-24994      | EMD-24995       |
| Donor                                        | 269            | 1412           | 1412           | 269            | 1051           | 1051           | 269            | 1412           | 1412           | 1412            |
| Number of molecular projection images in map | 25,472         | 7,005          | 12,703         | 50,615         | 25,083         | 54,733         | 50,313         | 3,885          | 4,846          | 14,555          |
| Symmetry                                     | C1             | C1             | C1             | C1             | C1             | C1             | C1             | C1             | C1             | C1              |
| Map resolution (FSC 0.143; Å)                | 3.3            | 4.7            | 4.2            | 3.1            | 3.2            | 3.0            | 3.0            | 8.0            | 7.1            | 5.0             |
| Map sharpening B-factor (Å <sup>2</sup> )    | -64.7          | -137.8         | -104.5         | -76.9          | -63.4          | -70.3          | -67.9          | -415.6         | -242.8         | -105.1          |
| <b>Structure Building and Validation</b>     |                |                |                |                |                |                |                |                |                |                 |
| <i>Number of residues in deposited model</i> |                |                |                |                |                |                |                |                |                |                 |
| Amino acids                                  | 3756           | 3739           | 3755           | 3740           | 3790           | 3769           | 3738           |                |                |                 |
| Carbohydrates                                | 56             | 55             | 55             | 56             | 85             | 62             | 58             |                |                |                 |
| Sapientic acid                               | 3              | 3              | 3              | 3              | 3              | 3              | 3              |                |                |                 |
| MolProbity score                             | 1.02           | 1.07           | 1.03           | 0.80           | 0.76           | 0.76           | 0.69           |                |                |                 |
| Clashscore                                   | 1.85           | 1.93           | 1.62           | 0.54           | 0.78           | 0.84           | 0.50           |                |                |                 |
| EMRinger score                               | 3.62           | 0.83           | 2.06           | 4.5            | 4.32           | 4.9            | 4.74           |                |                |                 |
| <i>RMSD from ideal</i>                       |                |                |                |                |                |                |                |                |                |                 |
| Bond length (Å)                              | 0.018          | 0.019          | 0.020          | 0.022          | 0.022          | 0.023          | 0.021          |                |                |                 |
| Bond angles (°)                              | 1.674          | 1.718          | 1.704          | 1.708          | 1.654          | 1.645          | 1.749          |                |                |                 |
| <i>Ramachandran plot</i>                     |                |                |                |                |                |                |                |                |                |                 |
| Favored (%)                                  | 97.7           | 97.4           | 97.4           | 97.4           | 97.9           | 98             | 97.9           |                |                |                 |
| Allowed (%)                                  | 2.3            | 2.6            | 2.6            | 2.6            | 2.1            | 2              | 2.1            |                |                |                 |
| Outliers (%)                                 | 0              | 0              | 0              | 0              | 0              | 0              | 0              |                |                |                 |
| Side chain rotamer outliers (%)              | 0.36           | 0              | 0              | 0.23           | 0.42           | 0.26           | 0.16           |                |                |                 |
| PDB                                          | 7SB3           | 7SB4           | 7SB5           | 7SBV           | 7SBW           | 7SBX           | 7SBY           |                |                |                 |

**Table S3. Predicted CDR lengths for HCoV-OC43 Fabs**

| <b>Fab</b> | <b>Heavy Chain</b> |              |              | <b>Light Chain</b> |              |              |
|------------|--------------------|--------------|--------------|--------------------|--------------|--------------|
|            | <b>HCDR1</b>       | <b>HCDR2</b> | <b>HCDR3</b> | <b>LCDR1</b>       | <b>LCDR2</b> | <b>LCDR3</b> |
| Fab1       | 8                  | 11           | 14           | 8                  | 3            | 9            |
| Fab2       | 8                  | 11           | 14           | 6                  | 2            | 9            |
| Fab3       | 8                  | 9            | 10           | 6                  | 3            | 8            |
| Fab4       | 10                 | 11           | 15           | 4                  | 3            | 9            |
| Fab5       | 8                  | 11           | 18           | 6                  | 2            | 9            |
| Fab6       | 8                  | 10           | 19           | 12                 | 3            | 9            |
| Fab7       | 8                  | 13           | 15           | 7                  | 3            | 5            |

**Table S4. Refinement and model building statistics for SARS-2-Fab complexes**

| <b>Map</b>                                      | <b>SARS-CoV-2-<br/>Fab11</b> | <b>SARS-CoV-2-<br/>Fab12</b> | <b>SARS-CoV-2-<br/>Fab13</b> | <b>SARS-CoV-2-<br/>Fab14</b> | <b>SARS-CoV-2-<br/>Fab15</b> |
|-------------------------------------------------|------------------------------|------------------------------|------------------------------|------------------------------|------------------------------|
| EMDB                                            | EMD-24996                    | EMD-24997                    | EMD-24998                    | EMD-24999                    | EMD-25000                    |
| Donors                                          | 1988/1989                    | 1988/1989                    | 1988/1989                    | 1988/1989                    | 1988/1989                    |
| Number of molecular<br>projection images in map | 39,824                       | 14,383                       | 13,190                       | 9,023                        | 28,914                       |
| Symmetry                                        | C1                           | C1                           | C1                           | C1                           | C1                           |
| Map resolution (FSC 0.143;<br>Å)                | 3.9                          | 4.2                          | 4.3                          | 4.4                          | 4.1                          |
| Map sharpening B-factor<br>(Å <sup>2</sup> )    | -76.2                        | -93.1                        | -81.2                        | -90.0                        | -79.3                        |
